# Supplementary material
Source: PubMed Central journal article supplement (PMC5520640)
Supplement: NIHMS877122-supplement-Supplemental.pdf [file NIHMS877122-supplement-Supplemental.pdf]

## Expression of MycG for NMR

### *Plasmid and transformation*

The MycG was originally expressed from a pET28b vector in *E. coli* BL21, but due to difficulties with expression in perdeuterated media using the pET28b construct, the MycG gene was removed by double digestion (HindIII, NdeI) and ligated into a pAW5775 plasmid construct. The pAW5775 plasmid was a gift from Dr. Luet-Lok Wong, and originally contained the P450cam C334A gene. The gene transfer removed the N-terminal 6x His tag from the MycG and placed the MycG gene into a system that has proven reliable for expression of deuterated P450 enzymes.

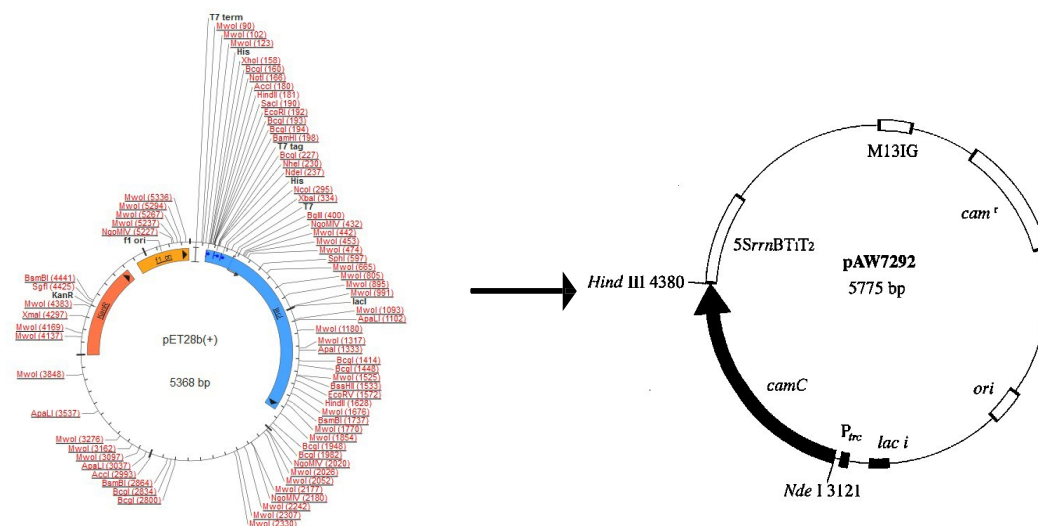

Figure S1: The MycG gene was transferred from the pET28B(+) vector to a pAW7292 plasmid by utilizing the HIND III and NDE I cut sites.

Approximately 100 ng of the resultant plasmid was transformed into 50 uL of *Escherichia coli* NMC533 by electroporation. Transformants were spread onto LB plates containing 25 mg/mL of chloramphenicol and 30 mg/mL kanamycin and incubated at 37° C for 18 hours.

*Expression of uniformly  $^{15}\text{N}$ -labeled MycG.* A single isolated colony was picked from plates of freshly transformed NCM533 *E. coli* and used to inoculate 5 mL of LB containing 25 mg/mL chloramphenicol and 30 mg/mL kanamycin. The inoculant was grown for 4 hours at 37<sup>0</sup> C with vigorous shaking until significant turbidity was observed. The 5 mL culture was then scaled up to 1 L of LB containing the same antibiotic concentrations. When an A<sub>600</sub> of 0.5 was reached the culture was centrifuged at 5,000 RPM for 20 minutes, and the pellet resuspended in M9+ minimal media containing  $^{15}\text{NH}_4\text{Cl}$  and the appropriate antibiotics. When the A<sub>600</sub> reached 0.8, heme precursor  $\gamma$ -aminolevulinic acid (ALA) was added to a concentration of 0.5 mM and the temperature was adjusted to 28<sup>0</sup>C. When A<sub>600</sub> =1 was reached, expression was induced by the addition of 1 mM isopropyl  $\beta$ -thiogalactoside (IPTG) and cultured with vigorous agitation for 18 hours. Cells were harvested by centrifugation at 5,000 RPM for 30 minutes and the pellets immediately stored at -80<sup>0</sup>C.

*Expression of uniformly  $^{13}\text{C},^{15}\text{N},^2\text{H}$  labeled MycG.* A single isolated colony was picked from fresh transformants as described above and used to inoculate 5 mL of LB with 25 mg/mL chloramphenicol and 30 mg/mL kanamycin. The inoculant was grown for 4 hours at 37<sup>0</sup>C with vigorous shaking until significant turbidity was observed. A 1 mL aliquot of the LB culture was transferred directly to 50 mL of M9+ media, then incubated at 37<sup>0</sup>C for 4 hours, at which time A<sub>600</sub> was 0.61. A 10 mL aliquot of the 50 mL culture was used to inoculate a 250 mL volume of 70% D<sub>2</sub>O, 30% H<sub>2</sub>O, M9+ media. The 70% D<sub>2</sub>O culture was incubated at 37<sup>0</sup> C for 6 hours until the A<sub>600</sub> reached 0.25. The cells were then spun down at 5,000 RPM for 20 minutes and resuspended in 250 mL of M9+ media prepared with 98 % D<sub>2</sub>O. The culture was then incubated at 37<sup>0</sup>C for 8 hours at which time the A<sub>600</sub> was 0.82. The cells

were again collected by centrifugation and resuspended in the final expression media, 1.5 L of M9+ prepared with 99% D<sub>2</sub>O (DLM-4-99-1000, CIL), 1.5 g of <sup>15</sup>NH<sub>4</sub>Cl, and 5 g of <sup>13</sup>C<sub>6</sub>, d<sub>7</sub> glucose (CIL). All components of the M9+ media were added solid and subsequently filter sterilized with the exception of CaCl<sub>2</sub> and FeCl<sub>3</sub> which were autoclaved separately and added later. Note that autoclave sterilization of deuterated media should be avoided to prevent dilution of deuterons, and all salts and additives should be prepared using D<sub>2</sub>O. After cells were added, the final expression culture was incubated at 37<sup>0</sup>C for 8 hours until an A600 of 0.70 was reached. At this time, incubation temperature was lowered to 28<sup>0</sup>C, followed by the addition of 2 g of <sup>13</sup>C, <sup>15</sup>N, <sup>2</sup>H Celtone base powder (CGM-1030P-CDN, CIL) and 105 mg of ALA. After one hour of incubation, expression was induced with 357 mg of IPTG. The culture was harvested 36 hours later by centrifugation at 5,000 RPM for 30 minutes. The harvested cell pellet (4.7 g) was immediately stored at -80<sup>0</sup>C.

**M9+ minimal media** (1 L volume):

800 mL ddH<sub>2</sub>O  
200 mL 5x M9 salts  
2 mL P1 metal mix  
2 mL 1 M MgSO<sub>4</sub>  
0.1 mL 0.1 M FeCl<sub>3</sub>  
0.1 mL 1 M CaCl<sub>2</sub> 16 uL  
2% thiamine 4 g glucose  
25 mg chloramphenicol  
30 mg kanamycin

**5x M9 salts** (1 L) (all masses are for anhydrous material)

34 g Na<sub>2</sub>HPO<sub>4</sub>  
15 g KH<sub>2</sub>PO<sub>4</sub>  
2.5 g NaCl  
4.0 g NH<sub>4</sub>Cl

**P1 metal mix (1 L)**34.36 g H<sub>3</sub>BO<sub>3</sub>4.32 g MnCl<sub>2</sub>·4H<sub>2</sub>O0.315 g ZnCl<sub>2</sub>0.03 g MoO<sub>3</sub>0.003 g CuSO<sub>4</sub>·5H<sub>2</sub>O0.012 g CoCl<sub>2</sub>·6H<sub>2</sub>O

*Expression of MycG with selectively <sup>15</sup>N labeled amino acids.* The preparation of a selectively labeled amino acid sample is similar to that of a uniformly <sup>15</sup>N labeled sample, except an amino acid mixture prepared as described below is substituted for <sup>15</sup>NH<sub>4</sub>Cl. Autoclavable amino acids can be autoclaved together and filter-sterilized amino acids are added to the media after it cools. To produce a selectively labeled sample, a <sup>15</sup>N version of the amino acid of interest is substituted for the natural abundance version. For preparation of the <sup>13</sup>C-Pro U-<sup>15</sup>N-sample used for the selective Pro-X HNC0 experiment, the recipe for <sup>15</sup>N-labeled M9+ media is used, with the addition of filter-sterilized U-<sup>13</sup>C-Pro (0.1 g) upon induction.

|     |        |                                         |
|-----|--------|-----------------------------------------|
| Ala | 0.50 g | Autoclave                               |
| Arg | 0.40 g | Autoclave                               |
| Asp | 0.40 g | Filter, dissolve by titrating with NaOH |
| Asn | 0.40 g | Filter                                  |
| Gln | 0.40 g | Filter, dissolve by titrating with HCl  |
| Glu | 0.65 g | Filter                                  |
| Gly | 0.55 g | Autoclave                               |
| His | 0.15 g | Autoclave                               |
| Ile | 0.23 g | Autoclave                               |
| Leu | 0.23 g | Autoclave                               |
| Lys | 0.42 g | Autoclave                               |
| Met | 0.25 g | Autoclave                               |
| Phe | 0.13 g | Autoclave                               |
| Pro | 0.10 g | Autoclave                               |
| Ser | 2.00 g | Autoclave                               |
| Thr | 0.23 g | Autoclave                               |
| Tyr | 0.17 g | Filter, dissolve by titrating with NaOH |
| Val | 0.23 g | Autoclave                               |
| Trp | 0.05 g | Filter                                  |
| Cys | 0.05 g | Filter                                  |

Preparation of the amino acid mixture is adapted from methods described in: Cheng, H., Westler, W. M., Xia, B., Oh, B. H. & Markley, J. L. Protein Expression, Selective Isotopic Labeling, and Analysis of Hyperfine-Shifted NMR Signals of *Anabaena* 7120 Vegetative [2Fe- 2S] Ferredoxin. *Archives of Biochemistry and Biophysics* 316, 619–634 (1995).

*Purification of MycG.* The described procedure is scaled for 5 g of cell paste, the typical yield for 1 L of growth media. The methods described can be scaled up to 15 grams of cell paste. Above this amount of cell mass multiple purifications are required to maintain efficiency. A frozen cell pellet (5g) was thawed and resuspended in 50 mL of lysis buffer. The cells were disrupted using a Misonix sonicator 3000 (Farmingdale, NY). The total sonication time was 6 minutes using a 20 seconds on, 40 seconds off program at a power level of 6.0 while the metal sonication beaker was kept cool with an ice bath. The lysate was centrifuged at 15,000 RPM in a Beckman JA20 rotor for 45 minutes to remove cell debris. The supernatant was decanted, placed in an ice-bath with stirring and precipitated by addition of 70 % w/v ammonium sulfate (approximately 25 g). The ammonium sulfate was ground to a fine powder, added in small (~0.5 g) increments over several minutes and allowed to stir for 30 minutes. The precipitated protein was collected by centrifugation at 15,000 RPM for 25 minutes. The protein pellets obtained were gently rinsed with water before being dissolved in 8 mL of low salt buffer. The re-dissolved protein was applied to a 20 mL HiTrap desalting column equilibrated with low salt buffer (see below). A properly desalted sample was obtained by loading 1 mL protein solution per 5 mL of column bed volume flowing at 3 mL/min. Within these guidelines, it was necessary to run and re-equilibrate the column a total of 3-4 times per prep. Loss of protein due to the multiple batch requirements was deemed negligible. The pooled desalted fractions were diluted to 100 mL with low salt buffer and loaded on a 25 mL bed volume DEAE ion exchange column equilibrated with low salt buffer. The protein was loaded by gravity and washed with 200 mL of low

salt buffer. The protein was eluted with a linear gradient from low salt to high salt buffer over a total volume of 200 mL. Fractions of 5 mL each were collected throughout the elution gradient. Purity of each fraction was assessed spectroscopically by  $A_{417}/A_{280}$ , with fractions having  $R > 0.5$  pooled and concentrated to 1 mL total volume. The pooled, and concentrated fractions were then loaded onto a HiPrep 26/60 Sephacryl S200 gel filtration column previously equilibrated with gel filtration buffer using an ATKA FPLC system flowing at 0.5 mL/min and collecting 3 mL fractions (see Figure S2). Fractions were again assessed for purity by measuring  $A_{417}/A_{280}$ , fractions with  $R > 1.5$  were pooled, concentrated to approximately 1 mL, and immediately stored in liquid nitrogen. All buffers are created fresh, filtered and degassed the day of use.

**Lysis Buffer**

50 mM TRIS pH 7.4  
50 mM KCl  
0.5 mM PMSF protease inhibitor  
10 ug/mL DNaseI  
10 ug/mL RNaseA  
100 ug/mL lysozyme

**Low salt buffer**

50 mM Tris HCl pH 7.4  
50 mM KCl

**High salt buffer**

50 mM Tris HCl pH 7.4  
250 mM KCl

**Gel Filtration buffer**

50 mM KPi pH 7.4  
200 mM KCl

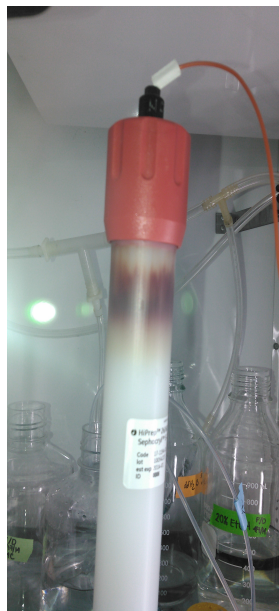

Fig. S2. To the left, an S200 size exclusion column loaded with MycG. Below, chromatogram of the S200 run. MycG is the large peak between 260 and 275 mL.

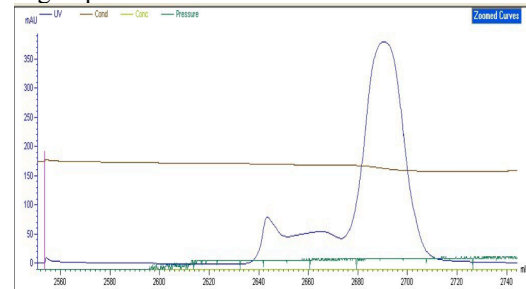

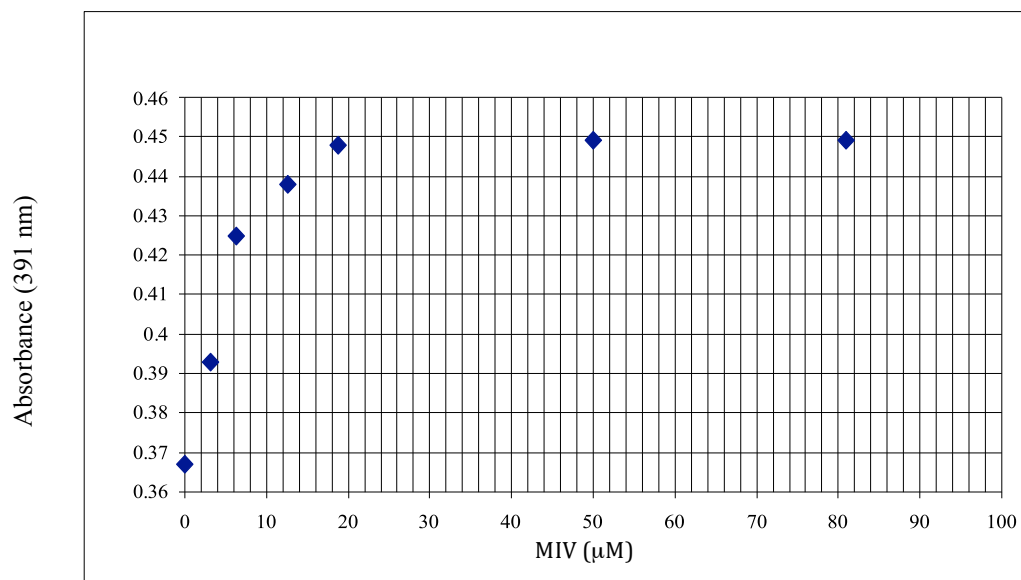

**Figure S4:** The absorbance increase at 391 nm as a function of MIV addition to 10  $\mu\text{M}$  MycG.

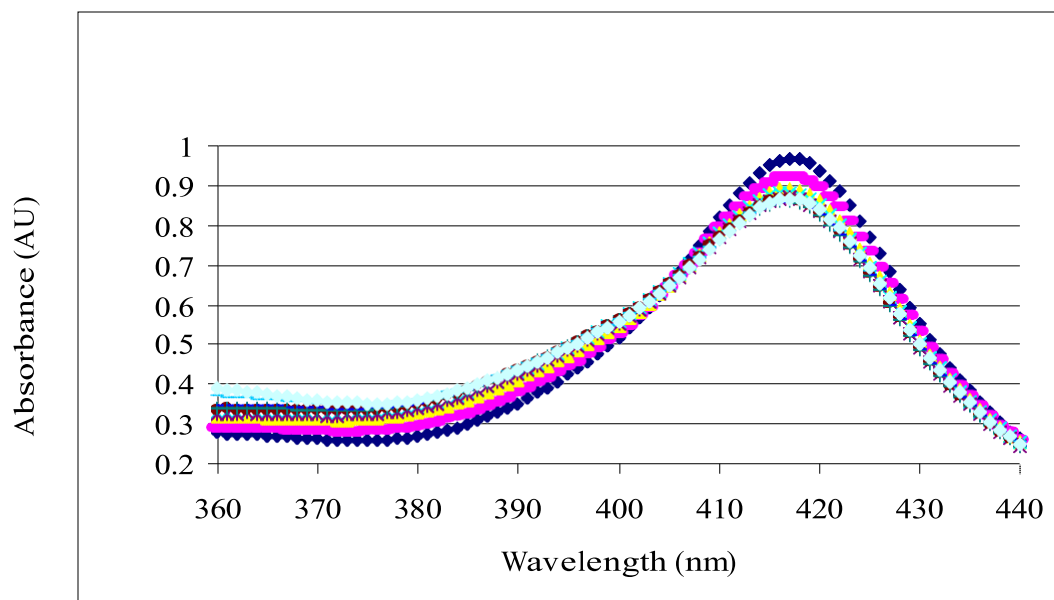

**Figure S3:** Overlay of UV/VIS spectra with MycG at 10  $\mu\text{M}$  and substrate ranging from 0 – 550  $\mu\text{M}$  (0, 3.2, 6.4, 9.5, 12.6, 18.8, 50, 81, 263, 550  $\mu\text{M}$ ) As MIV is added a decrease in absorbance is seen at 417 nm and an increase at 391 nm. Saturation of the transition is seen by 12.5  $\mu\text{M}$  MIV.

## AMBER 14 Scripts

### Heating:

Heating from 0-40 with constant volume

```
&cntrl
imin=0,
irest=0,
nstlim=20000,
dt=0.002,
ntc=2,
ntf=2,
nmropt=1,
ntpr=100,
ntwx=100,
cut=16,
ntb=1,
ntt=3,
gamma_ln=2.0,
tempi=0.0,
temp0=40.0,
/
&wt type='END' /
LISTOUT=POUT
DISANG=paraFeRestraint.dist
&end
```

### Equilibration (constant volume):

equilibrate at 300 constant volume

```
&cntrl
imin=0,
irest=1,
nstlim=100000,
dt=0.002,
ntc=2,
ntx=5,
ntf=2,
nmropt=1,
ntpr=100,
ntwx=1000,
cut=16,
ntb=1,
igb=0,
ntt=3,
gamma_ln=2.0,
tempi=300.0,
temp0=300.0,
/
&wt type='END' /
LISTOUT=POUT
DISANG=paraFeRestraint.dist
&end
```



### Equilibration (constant pressure):

1ns equilibrium with constant pressure

```
&cntrl
imin=0,
irest=1,
nstlim=100000,
dt=0.002,
ntc=2,
ntx=5,
ntf=2,
nmropt=0,
ntpr=250,
ntwx=10,
cut=16,
ntb=2,
ntp=1,
tautp=2.0,
igb=0,
ntt=3,
gamma_ln=2.0,
tempi=300.0,
temp0=300.0,

/
&wt type='END' /
LISTOUT=POUT
DISANG= paraFeRestraint.dist
&end
```

### Production runs:

RDC restrained 0.25 ns

```
&cntrl
imin=0,
irest=1,
nstlim=125000,
dt=0.002,
ntc=2,
ntx=5,
ntf=2,
nmropt=1,
ntpr=1000,
ntwx=1000,
cut=16,
ntb=2,
ntp=1,
tautp=2.0,
igb=0,
ntt=3,
gamma_ln=2.0,
tempi=300.0,
temp0=300.0,
&end
```

```

/
&wt type='END' /
LISTOUT=POUT
DISANG=paraFeRestraint.dist
DIPOLE=edited_RST.dip
&end

```

**Table S1.** Chemical shift perturbation ( $\Delta\delta$ ) upon saturation of MycG with MIV, and time point in minutes at which a signal is no longer observed in HD exchange (HDX) experiments.

| Res # | MIV titration<br>exchange behavior | $\Delta\delta$ $^1\text{H}$ | $\Delta\delta$ $^{15}\text{N}$ | Free HDX | MIV-bound<br>HDX |
|-------|------------------------------------|-----------------------------|--------------------------------|----------|------------------|
| 3     | Intermediate                       | 0                           | 20                             |          |                  |
| 4     | Slow                               | 22.4                        | 0                              | 0        | 0                |
| 7     | Fast                               | 13.6                        | 10                             | 1200     | 1200             |
| 8     | None                               | 0                           | 0                              | 0        | 0                |
| 9     | Intermediate                       | 12                          | 3                              | 0        | 0                |
| 14    | Slow                               | 14                          | 31                             | 0        | 0                |
| 15    | Fast                               | 14                          | 5                              | 0        | 0                |
| 16    | Slow                               | 40                          | 16                             | 0        | 0                |
| 17    | Slow                               | 22                          | 6                              | 1200     | 1200             |
| 20    | Slow                               | 28                          | 8                              | 0        | 0                |
| 21    | Intermediate                       | 6                           | 12                             | 0        | 0                |
| 23    | Fast                               | 16                          | 6                              | 0        | 0                |
| 24    | Intermediate                       | 0                           | 17                             | 1200     | 1200             |
| 25    | Sharpens                           | 0                           | 0                              | 0        | 0                |
| 27    | Sharpens                           | 0                           | 0                              | 0        | 0                |
| 28    | Slow                               | 35                          | 11                             | 0        | 0                |
| 29    | Fast                               | 0                           | 8                              | 800      | 800              |
| 30    | Intermediate                       | 19                          | 11                             | 1000     | 1000             |
| 32    | Sharpens                           | 0                           | 0                              | 0        | 0                |
| 33    | Sharpens                           | 0                           | 0                              | 1200     | 1200             |
| 34    | Slow                               | 28                          | 24                             | 0        | 0                |
| 35    | Fast                               | 13                          | 16                             | 120      | 120              |
| 36    | No Change                          | 0                           | 0                              | 1200     | 1200             |
| 39    | Intermediate                       | 116                         | 6                              | 800      | 600              |
| 40    | Fast                               | 18                          | 8                              | 0        | 0                |
| 41    | Sharpens                           | 0                           | 0                              | 0        | 0                |
| 42    | Fast                               | 12                          | 0                              | 0        | 0                |
| 43    | Fast                               | 0                           | 11                             | 600      | 600              |
| 44    | Sharpens                           | 0                           | 0                              | 0        | 0                |
| 45    | Intermediate                       | 35                          | 3                              | 180      | 180              |
| 46    | Intermediate                       | 0                           | 12                             | 0        | 0                |
| 47    | Sharpens                           | 0                           | 0                              | 1200     | 1200             |
| 48    | Sharpens                           | 0                           | 0                              | 1200     | 1200             |
| 49    | Intermediate                       | 0                           | 7                              | 120      | 120              |
| 50    | Intermediate                       | 2                           | 12                             | 120      | 120              |
| 51    | Intermediate                       | 60                          | 10                             | 120      | 60               |
| 52    | Broadens                           | 0                           | 0                              | 1200     | 60               |
| 53    | Intermediate                       | 39                          | 22                             | 0        | 0                |

|     |              |     |    |      |      |
|-----|--------------|-----|----|------|------|
| 54  | Intermediate | 0   | 23 | 600  | 1200 |
| 55  | Grows in     | 0   | 0  | 0    | 0    |
| 56  | No change    | 0   | 0  | 1200 | 1200 |
| 57  | Slow         | 64  | 0  | 180  | 0    |
| 58  | Sharpens     | 0   | 0  | 0    | 0    |
| 60  | Slow         | 53  | 23 | 0    | 0    |
| 61  | Slow         | 48  | 16 | 600  | 30   |
| 62  | Slow         | 14  | 45 | 1200 | 0    |
| 63  | Sharpens     | 0   | 0  | 0    | 0    |
| 64  | Slow         | 141 | 55 | 0    | 0    |
| 66  | Sharpens     | 99  | 5  | 1200 | 0    |
| 67  | Slow         | 19  | 26 | 150  | 0    |
| 68  | Slow         | 35  | 2  | 150  | 150  |
| 70  | Intermediate | 7   | 12 | 0    | 0    |
| 73  | Fast         | 6   | 1  | 480  | 60   |
| 74  | Slow         | 68  | 32 | 0    | 0    |
| 77  | Intermediate | 28  | 8  | 0    | 0    |
| 81  | None         | 0   | 0  | 0    | 0    |
| 84  | Slow         | 56  | 2  | 1200 | 1200 |
| 87  | Fast         | 0   | 46 | 0    | 0    |
| 92  | Slow         | 26  | 2  | 1200 | 1200 |
| 93  | Fast         | 14  | 11 | 60   | 0    |
| 94  | None         | 0   | 0  | 0    | 0    |
| 95  | slow         | 28  | 0  | 0    | 0    |
| 97  | Sharpens     | 0   | 0  | 0    | 0    |
| 108 | Sharpens     | 0   | 0  | 0    | 0    |
| 109 | Slow         | 26  | 7  | 1200 | 1200 |
| 110 | None         | 0   | 0  | 0    | 0    |
| 111 | Intermediate | 7   | 24 | 300  | 300  |
| 112 | Sharpens     | 0   | 0  | 0    | 0    |
| 113 | Sharpens     | 0   | 0  | 1200 | 1200 |
| 114 | Intermediate | 24  | 0  | 0    | 0    |
| 115 | Slow         | 56  | 12 | 480  | 120  |
| 116 | Sharpens     | 0   | 0  | 0    | 0    |
| 118 | Sharpens     | 0   | 0  | 1200 | 1200 |
| 123 | Sharpens     | 13  | 24 | 0    | 0    |
| 126 | Fast         | 6   | 10 | 300  | 120  |
| 127 | Sharpens     | 0   | 0  | 0    | 0    |
| 128 | Slow         | 35  | 47 | 1200 | 0    |
| 129 | Slow         | 70  | 4  | 60   | 60   |
| 130 | Intermediate | 2   | 19 | 1200 | 1200 |
| 132 | Fast         | 12  | 24 | 60   | 180  |
| 133 | Broadens     | 0   | 0  | 0    | 0    |
| 134 | Sharpens     | 0   | 0  | 0    | 0    |
| 136 | Sharpens     | 0   | 0  | 0    | 0    |
| 138 | Slow         | 29  | 0  | 300  | 120  |
| 146 | Intermediate | 4   | 34 | 0    | 0    |
| 156 | None         | 0   | 0  | 0    | 0    |
| 157 | None         | 0   | 0  | 0    | 0    |
| 174 | Slow         | 36  | 7  | 30   | 30   |

|     |              |      |    |      |      |
|-----|--------------|------|----|------|------|
| 176 | Intermediate | 68   | 11 | 60   | 60   |
| 177 | Slow         | 9    | 12 | 1200 | 1200 |
| 190 | Slow         | 30   | 23 | 60   | 60   |
| 191 | Intermediate | 13   | 62 | 0    | 0    |
| 193 | Slow         | 67   | 24 | 60   | 0    |
| 198 | Slow         | 18.4 | 18 | 0    | 0    |
| 199 | Fast         | 20   | 0  | 480  | 30   |
| 202 | Intermediate | 20   | 2  | 0    | 0    |
| 207 | Slow         | 25   | 16 | 120  | 0    |
| 208 | Intermediate | 66   | 2  | 600  | 600  |
| 215 | Fast         | 14   | 10 | 600  | 600  |
| 216 | Fast         | 5    | 0  | 0    | 0    |
| 217 | None         | 0    | 0  | 0    | 0    |
| 225 | Intermediate | 40   | 15 | 0    | 0    |
| 235 | Intermediate | 88   | 15 | 180  | 180  |
| 251 | None         | 0    | 0  | 1200 | 1200 |
| 252 | Fast         | 8    | 4  | 480  | 120  |
| 256 | Fast         | 7    | 0  | 0    | 0    |
| 258 | No Exchange  | 0    | 0  | 1200 | 1200 |
| 259 | Intermediate | 29   | 12 | 1200 | 800  |
| 260 | Fast         | 8    | 0  | 800  | 800  |
| 265 | None         | 0    | 0  | 600  | 600  |
| 266 | None         | 0    | 0  | 0    | 0    |
| 270 | Intermediate | 42   | 0  | 0    | 0    |
| 289 | Sharpens     | 0    | 0  | 0    | 0    |
| 291 | Slow         | 24   | 26 | 30   | 180  |
| 294 | Sharpens     | 0    | 0  | 0    | 0    |
| 295 | None         | 0    | 0  | 180  | 180  |
| 296 | Fast         | 0    | 6  | 180  | 180  |
| 298 | Sharpens     | 0    | 0  | 600  | 600  |
| 300 | None         | 0    | 0  | 120  | 120  |
| 301 | Fast         | 4    | 0  | 600  | 600  |
| 302 | Intermediate | 12   | 3  | 480  | 1200 |
| 303 | Fast         | 5    | 0  | 0    | 0    |
| 304 | Intermediate | 35   | 4  | 30   | 30   |
| 305 | Intermediate | 48   | 24 | 0    | 0    |
| 307 | Intermediate | 29   | 32 | 180  | 180  |
| 308 | Sharpens     | 0    | 0  | 0    | 0    |
| 311 | Slow         | 40   | 5  | 600  | 600  |
| 318 | Intermediate | 22   | 20 | 0    | 0    |
| 320 | Intermediate | 46   | 12 | 240  | 180  |
| 323 | None         | 0    | 0  | 60   | 60   |
| 324 | Intermediate | 13   | 12 | 0    | 0    |
| 325 | Intermediate | 24   | 11 | 120  | 60   |
| 326 | Intermediate | 8    | 15 | 0    | 0    |
| 327 | Fast         | 4    | 2  | 30   | 0    |
| 328 | Intermediate | 27   | 4  | 180  | 120  |
| 329 | Fast         | 0    | 50 | 0    | 0    |
| 337 | Sharpens     | 0    | 0  | 30   | 30   |
| 353 | None         | 0    | 0  | 1200 | 1200 |
| 366 | Intermediate | 54   | 15 | 0    | 0    |
| 369 | Fast         | 4    | 8  | 0    | 0    |
| 370 | Sharpens     | 0    | 0  | 0    | 0    |
| 372 | Fast         | 6    | 0  | 0    | 0    |
| 373 | Intermediate | 26   | 2  | 0    | 0    |
| 374 | None         | 0    | 0  | 480  | 480  |
| 377 | Slow         | 56   | 2  | 30   | 180  |

|     |              |    |    |      |      |
|-----|--------------|----|----|------|------|
| 380 | Sharpens     | 0  | 0  | 0    | 0    |
| 381 | Sharpens     | 0  | 0  | 0    | 0    |
| 382 | Intermediate | 17 | 18 | 0    | 0    |
| 384 | Slow         | 4  | 32 | 0    | 0    |
| 385 | Sharpens     | 0  | 0  | 0    | 0    |
| 389 | Slow         | 21 | 23 | 0    | 0    |
| 391 | Broadens     | 0  | 0  | 0    | 0    |
| 392 | Fast         | 14 | 9  | 600  | 600  |
| 395 | Intermediate | 28 | 14 | 1200 | 0    |
| 396 | Intermediate | 8  | 13 | 1200 | 1200 |
| 397 | Fast         | 9  | 9  | 0    | 0    |

**Table S2.**  $^{15}\text{N}$   $R_1$  relaxation times for MIV-bound MycG

| Res # | $T_1$ (s) | $T_2$ (ms) |
|-------|-----------|------------|
| 3     | 2.03      | 36.2       |
| 4     | 1.04      | 172.3      |
| 7     | 2.10      | 22.1       |
| 8     | 2.12      | 28.7       |
| 9     | 2.17      | 27.0       |
| 14    | 2.07      | 120.5      |
| 16    | 8.88      | 56.7       |
| 17    | 1.89      | 40.6       |
| 20    | 3.90      | 18.3       |
| 21    | 3.08      | 20.9       |
| 23    | 2.24      | 25.5       |
| 28    | 2.45      | 21.1       |
| 29    | 2.87      | 19.8       |
| 30    | 2.49      | 26.5       |
| 33    | 2.53      | 24.1       |
| 34    | 3.27      | 20.6       |
| 35    | 2.84      | 18.3       |
| 36    | 1.78      | 42.9       |
| 39    | 1.09      | 55.6       |
| 40    | 2.11      | 20.7       |
| 41    | 3.36      | 21.5       |
| 42    | 2.50      | 14.5       |
| 44    | 2.13      | 28.7       |
| 46    | 3.26      | 36.9       |
| 48    | 3.63      | 26.8       |
| 50    | 2.57      | 21.8       |
| 51    | 3.18      | 19.7       |
| 52    | 3.04      | 27.9       |
| 53    | 2.39      | 20.0       |
| 54    | 3.04      | 21.3       |
| 57    | 2.23      | 18.3       |
| 58    | 2.02      | 27.4       |
| 59    | 5.10      | 25.7       |
| 60    | 2.78      | 23.2       |
| 61    | 2.43      | 22.2       |

|     |      |       |
|-----|------|-------|
| 62  | 5.29 | 23.5  |
| 63  | 3.43 | 20.8  |
| 66  | 2.44 | 26.8  |
| 67  | 2.20 | 17.5  |
| 68  | 1.94 | 18.2  |
| 70  | 2.47 | 21.1  |
| 73  | 2.80 | 24.7  |
| 74  | 1.27 | 18.7  |
| 77  | 1.25 | 430.2 |
| 83  | 1.38 | 52.6  |
| 84  | 3.29 | 20.8  |
| 87  | 2.37 | 20.3  |
| 92  | 1.32 | 140.8 |
| 94  | 2.04 | 21.4  |
| 95  | 3.14 | 23.5  |
| 97  | 1.97 | 21.9  |
| 109 | 1.96 | 28.6  |
| 111 | 2.26 | 25.5  |
| 113 | 2.70 | 21.9  |
| 114 | 3.13 | 20.9  |
| 115 | 3.02 | 21.3  |
| 123 | 3.18 | 19.9  |
| 126 | 2.68 | 19.0  |
| 129 | 1.61 | 34.0  |
| 132 | 2.58 | 23.5  |
| 133 | 3.09 | 22.0  |
| 137 | 2.88 | 21.9  |
| 138 | 2.39 | 23.3  |
| 174 | 1.07 | 23.9  |
| 176 | 2.12 | 26.8  |
| 177 | 2.76 | 21.5  |
| 178 | 2.05 | 21.8  |
| 178 | 2.14 | 22.3  |
| 189 | 1.76 | 114.7 |
| 190 | 2.62 | 24.8  |
| 192 | 2.16 | 23.8  |
| 193 | 2.05 | 24.3  |
| 198 | 3.01 | 24.6  |
| 199 | 2.13 | 21.8  |
| 200 | 2.27 | 33.7  |
| 203 | 2.96 | 23.4  |
| 207 | 2.40 | 28.8  |
| 208 | 1.97 | 23.2  |
| 215 | 2.89 | 23.2  |
| 216 | 2.30 | 21.2  |
| 217 | 1.02 | 236.4 |
| 225 | 2.89 | 20.8  |
| 230 | 2.35 | 18.4  |
| 235 | 2.69 | 24.4  |
| 251 | 2.84 | 22.0  |
| 252 | 2.84 | 20.1  |
| 256 | 3.04 | 24.3  |
| 260 | 2.53 | 22.2  |
| 261 | 2.34 | 23.3  |
| 262 | 2.70 | 24.0  |

|     |      |      |
|-----|------|------|
| 265 | 2.32 | 20.6 |
| 266 | 1.56 | 68.9 |
| 270 | 2.33 | 21.6 |
| 272 | 1.90 | 20.2 |
| 273 | 2.00 | 19.3 |
| 293 | 2.87 | 24.2 |
| 295 | 2.48 | 31.1 |
| 296 | 2.91 | 23.1 |
| 298 | 2.11 | 21.2 |
| 300 | 2.04 | 40.7 |
| 301 | 2.46 | 19.4 |
| 302 | 1.54 | 19.8 |
| 302 | 1.54 | 20.8 |
| 303 | 3.57 | 23.5 |
| 304 | 2.93 | 19.9 |
| 305 | 3.21 | 21.0 |
| 307 | 6.17 | 20.7 |
| 311 | 2.45 | 24.7 |
| 313 | 1.82 | 38.3 |
| 314 | 1.88 | 53.7 |
| 318 | 2.49 | 23.5 |
| 319 | 3.01 | 21.3 |
| 320 | 1.53 | 19.9 |
| 321 | 2.82 | 25.5 |
| 323 | 2.48 | 23.4 |
| 324 | 2.09 | 28.2 |
| 325 | 2.26 | 23.8 |
| 326 | 1.98 | 32.9 |
| 327 | 2.82 | 41.4 |
| 328 | 2.43 | 13.5 |
| 329 | 3.09 | 20.4 |
| 339 | 2.05 | 21.0 |
| 342 | 2.95 | 40.1 |
| 366 | 2.19 | 25.7 |
| 367 | 2.71 | 27.5 |
| 369 | 3.00 | 19.0 |
| 372 | 3.12 | 20.5 |
| 373 | 3.53 | 13.3 |
| 374 | 2.44 | 21.0 |
| 376 | 2.97 | 26.0 |
| 377 | 2.80 | 19.8 |
| 377 | 2.80 | 19.8 |
| 382 | 2.24 | 23.7 |
| 384 | 1.30 | 55.4 |
| 391 | 2.56 | 21.8 |
| 392 | 2.65 | 61.0 |
| 395 | 4.44 | 21.4 |
| 396 | 3.78 | 22.6 |
| 397 | 2.79 | 22.2 |
